# Supplementary material
Source: PubMed Central journal article supplement (PMC2663935)

## SUPPLEMENTAL DATA

**Supplemental Figure 1.** Disruption of autophagic flux in *Atg13* mutants. (A) Shown are fixed fat body samples from control and *Atg13<sup>Δ81</sup>* mutant animals expressing UAS-LAMP-GFP and UAS-mCherry-Atg8a, which label lysosomal and autophagic vesicles, respectively. In control animals, starvation results in a progressive enlargement of LAMP-GFP structures, most of which co-label with mCherry-Atg8a by 4 hours. Disruption of Atg13 blocks both the enlargement of lysosomes and their co-labeling with mCherry-Atg8a. (B) *Atg13<sup>Δ81</sup>* mutant clone (GFP-negative cells) showing accumulation of endogenous P62/Ref(2)P.

**Supplemental Figure 2.** Additional Atg1 and Atg13 autophagy phenotypes. (A-C) Atg13 RNAi suppresses starvation-induced autophagy. 4-hr starvation induces punctate GFP-Atg8a staining in control cell clones (A) but not in cells co-expressing the hairpin construct 7331-r1 (B). Clonal expression of 7331-r1 (GFP-positive cells) blocks punctate LysoTracker Red staining in response to starvation (C). (D) Rapamycin treatment induces punctate localization of mCherry-Atg8a in control cells of the eye-antennal imaginal disc but not in cell clones mutant for *Atg13* (GFP-negative cells). (E) *Atg13* mutant cells (GFP-negative) are resistant to induction of punctate mCherry-Atg8a localization induced developmentally during the wandering L3 (wL3) larval stage. (F-G) *Atg1* mutant cell clones (dsRed-negative cells) fail to display punctate GFP-Atg8a staining in response to 4-hr starvation (F) or to developmental cues at the wL3 stage (G). (H-J) Nutrient- and Atg1-independent induction of autophagy by activation of Jnk signaling. Overexpression of the Jun kinase homolog Bsk leads to formation of mCherry-Atg8a punctae under fed conditions (I), which is not observed in control animals expressing mCherry-Atg8a alone (H). Expression of Bsk also leads to mCherry-Atg8a punctae in *Atg1<sup>Δ3D</sup>* homozygous mutant animals (J). (K-L) Cell clones overexpressing Atg1 from the GS10979 UAS element in the *Atg1* locus (GFP-positive cells) display weak LysoTracker Red staining in the perinuclear region (K). Co-expression of Atg13 leads to a larger, more intensely staining punctate structures (L).

**Supplemental Figure 3.** Nutrient- and TOR-dependent phosphorylation of Atg1 and Atg13. Shown are immunoblot analyses of fat body tissues dissected from *Drosophila* larvae expressing

Myc-Atg1 or Atg13-Flag and indicated UAS-regulated transgenes, using the hs-GAL4 driver. **(A, D)** Sub-populations of Atg13-Flag (A) and Myc-Atg1 (D) with reduced mobility can be identified under both fed and starved conditions; the upper form of each protein is reduced in response to phosphatase treatment (CIP). Starvation leads to a moderate increase in levels and a more modest change in phosphorylation of both proteins. Phosphorylation of kinase-defective (KD) Myc-Atg1 is apparent only under fed conditions. **(B, E)** Overexpression of Rheb or Tsc1/Tsc2 mimics the effects of nutrient signaling, leading to a slight increase in the effect of feeding (Rheb) or starvation (Tsc1/2) on Atg13-Flag (B) and Myc-Atg1 (E) phosphorylation. **(C)** Effect of nutrient status and TOR activity on Atg13-Flag phosphorylation in later stage (96-120 hr @ 25 °C) larvae. Under these conditions, co-expression of Atg1 stimulates phosphorylation of Atg13-Flag under both fed and starved conditions. Co-expression of Tsc1/Tsc2 inhibits the nutrient-dependent phosphorylation, whereas Rheb has little effect. **(F)** Comparison of protein expression levels of UAS-Atg1 transgenic lines. Immunoblot of fat body extracts from equal numbers of larvae expressing either Myc-tagged Atg1, untagged Atg1 from a pUAST-Atg1 transgene (6B) or untagged Atg1 from a GAL4-responsive construct inserted in the Atg1 locus (GS10797), probed with affinity-purified rabbit antibodies raised against the C-terminal 20 residues of *Drosophila* Atg1. These antibodies detect overexpressed wild type and epitope tagged Atg1, but not the endogenous protein, as indicated by the lack of bands corresponding to non-tagged Atg1 in lanes 1 and 2.

**Supplemental Figure 4.** Requirement for Atg13 in Atg1 overexpression phenotypes. **(A, B)** *Atg13* mutation suppresses Atg1-induced apoptosis. Constitutive overexpression of Atg1 throughout the larval fat body was mediated by Cg-GAL4 and UAS-Atg1<sup>GS10797</sup> transgenes. In control animals, Atg1 overexpression results in reduced organ size and extensive cell death, as indicated by the presence of TUNEL-positive, highly condensed nuclei (A). No TUNEL-positive nuclei were observed in *Atg13* mutants overexpressing Atg1 (B). **(C, D)** Loss of Atg13 does not suppress the cell size reduction caused by high levels of Atg1. Clonal overexpression of Atg1 using Act>CD2>GAL4 and UAS-Atg1<sup>6B</sup> inhibits cell growth in both control (C) and *Atg13* mutant (D) animals. GFP marks Atg1 expressing cells; cell boundaries are labeled by phalloidin.

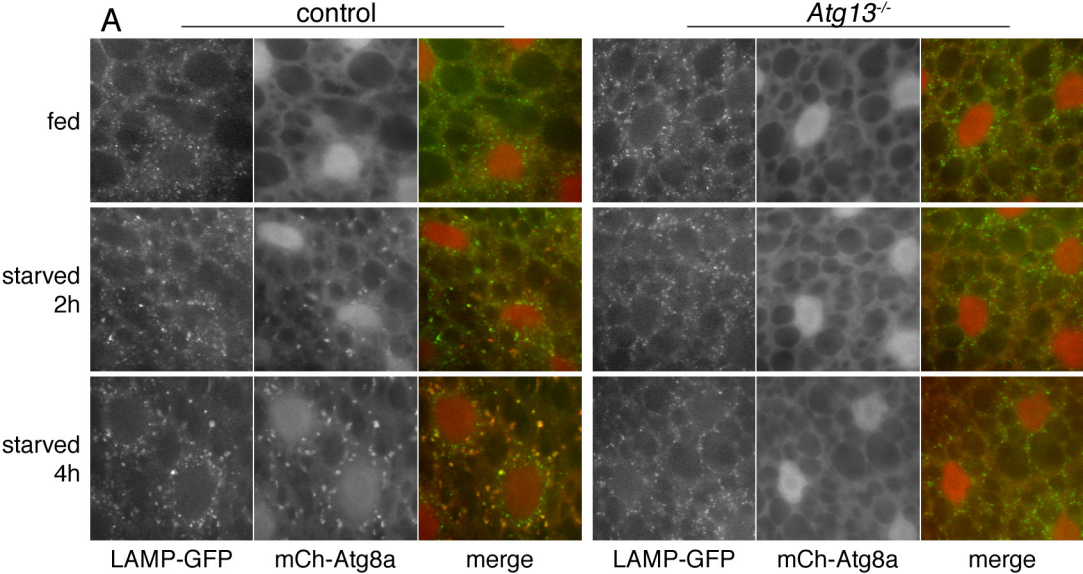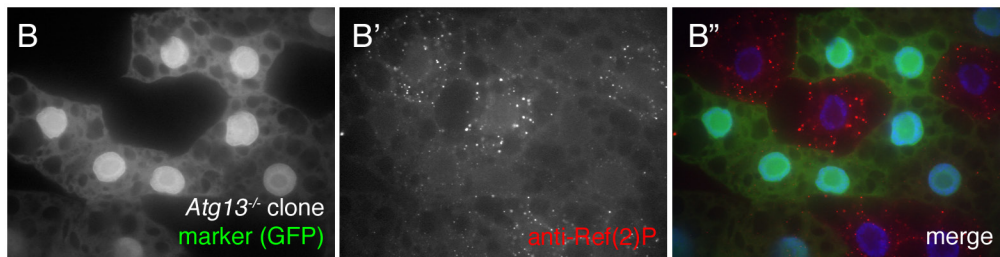

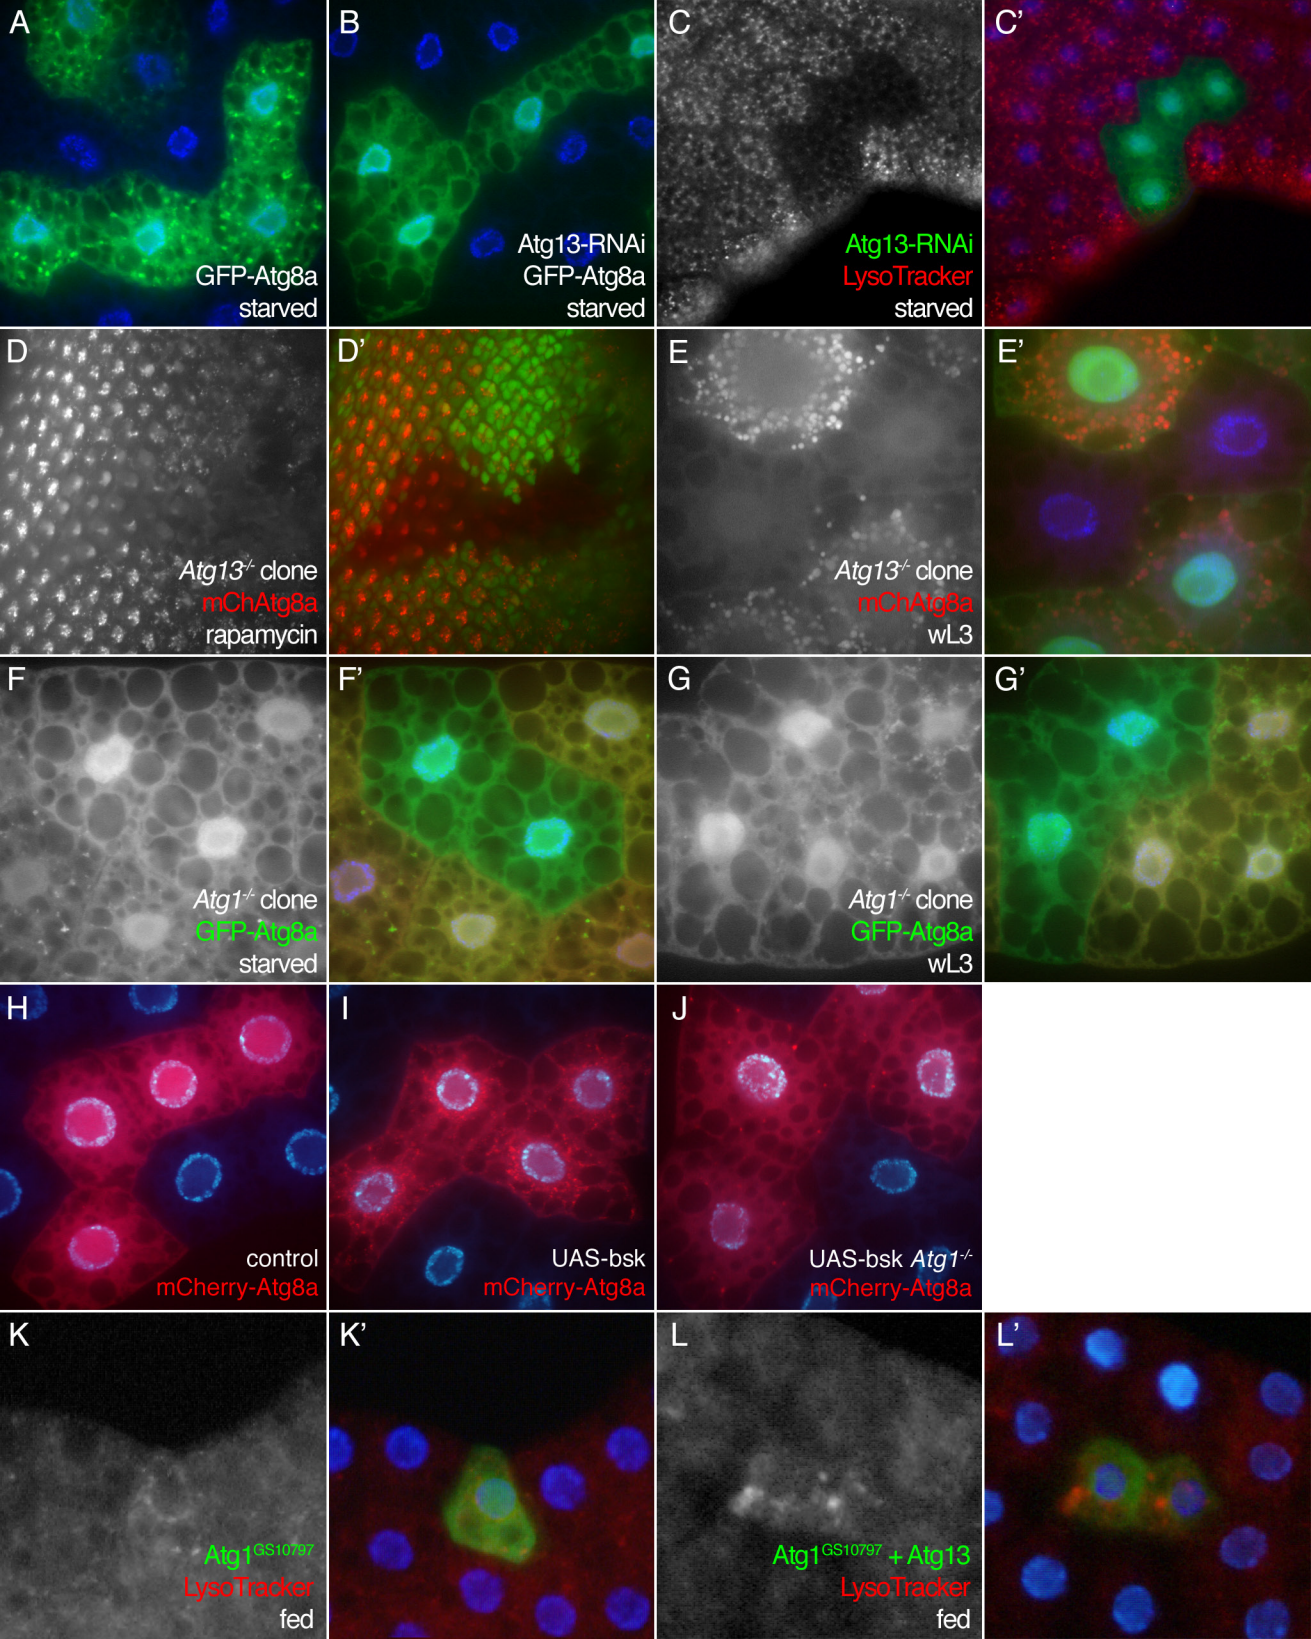

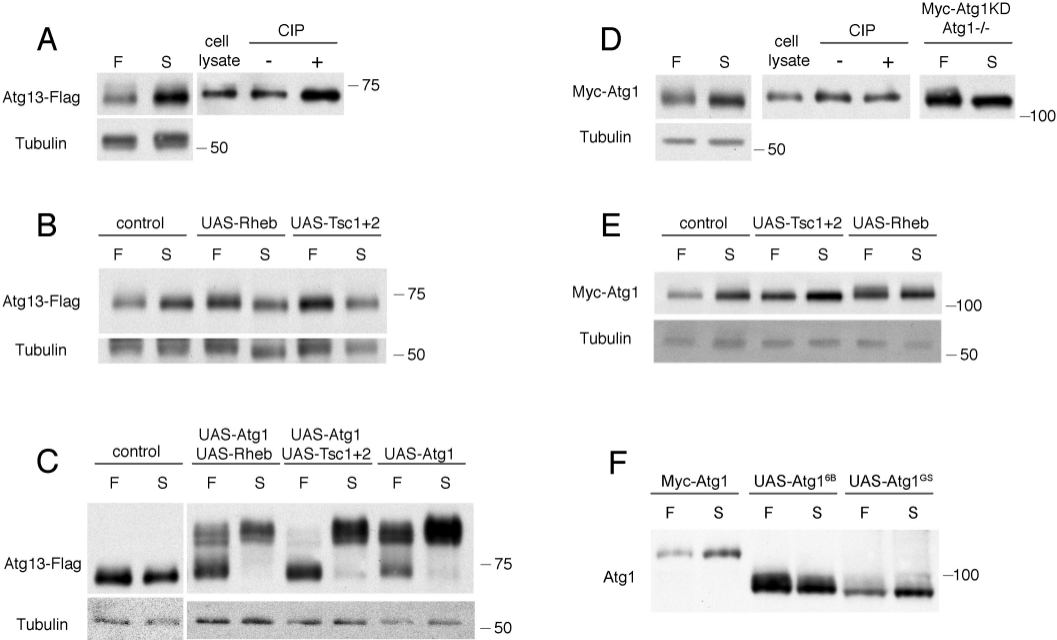

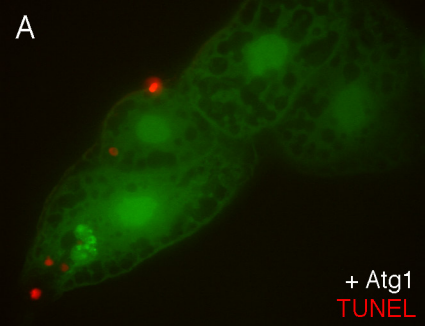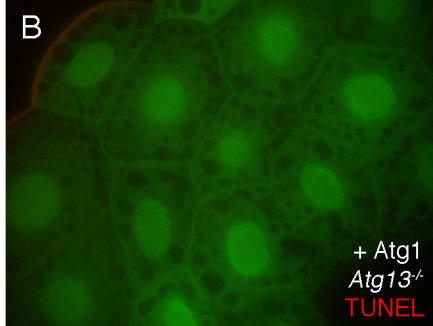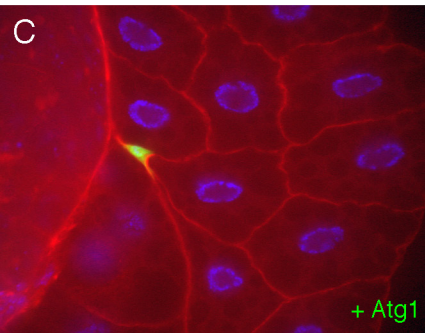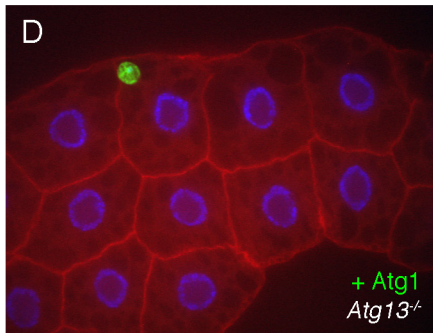

Supplement: E08-12-1250_1.pdf [file E08-12-1250_1.pdf]
